# Supplementary material
Source: PubMed Central journal article supplement (PMC3715895)
Supplement: cn4000346_si_001.pdf [file cn4000346_si_001.pdf]

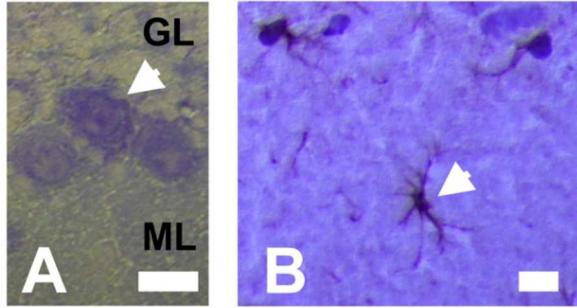

**Supporting Figure 1:** (A) Coomassie blue staining of cerebellar Purkinje neurons (white arrow). (B) A representative example of GFAP immuno-reactivity in the cerebellum of formaldehyde-vapor-fixed tissue section (haematoxylin counter stain). Arrow indicates the location of classical astrocyte processes. Scale bar = 20  $\mu\text{m}$ .

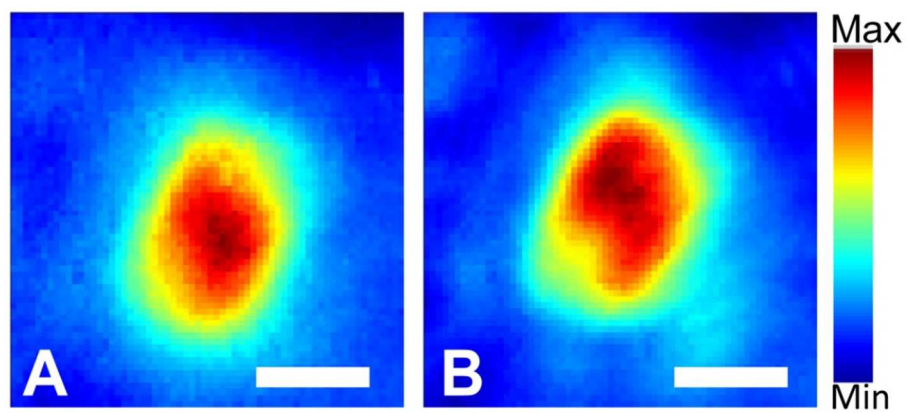

**Supporting Information Figure 2:** FTIR images of the relative protein content (area underneath the amide I band) calculated from (A) raw spectra and (B) spectra corrected for resonance mie scattering. Scale bar = 10  $\mu\text{m}$
